# Supplementary material
Source: publisher figshare collection journal article supplement (https://tandf.figshare.com/ndownloader/files/7432819)
Supplement: Supplementary file 1 [file 7432819]

**Supplemental information**

**Figure S1.** Detailed schematic of large-scale cell stretch device. (A) Overall configuration of the large scale cell stretcher. The device consists of the cover, the platform, and Corning tissue culture dish. All acrylic pieces are laser cut, tapped, and glued as needed. The servo-motor, the servo-linkage, and the rail and carriage system are based on commercially available parts. (B) Close-up views of major stretcher components. The servo motor is placed into the servo motor mount, which is attached to the platform base with acrylic glue. Linkage connects the servo’s control arm to the sliding membrane mount. (C) The sliding membrane mount is attached to a rail and carriage system, which is translated by the servo motor through the linkage, stretching the membrane. (D) The fixed membrane mount is glued to the platform base on the opposite side of the servo motor. The PDMS membrane is sandwiched between two acrylic pieces holding the membrane in place.

**
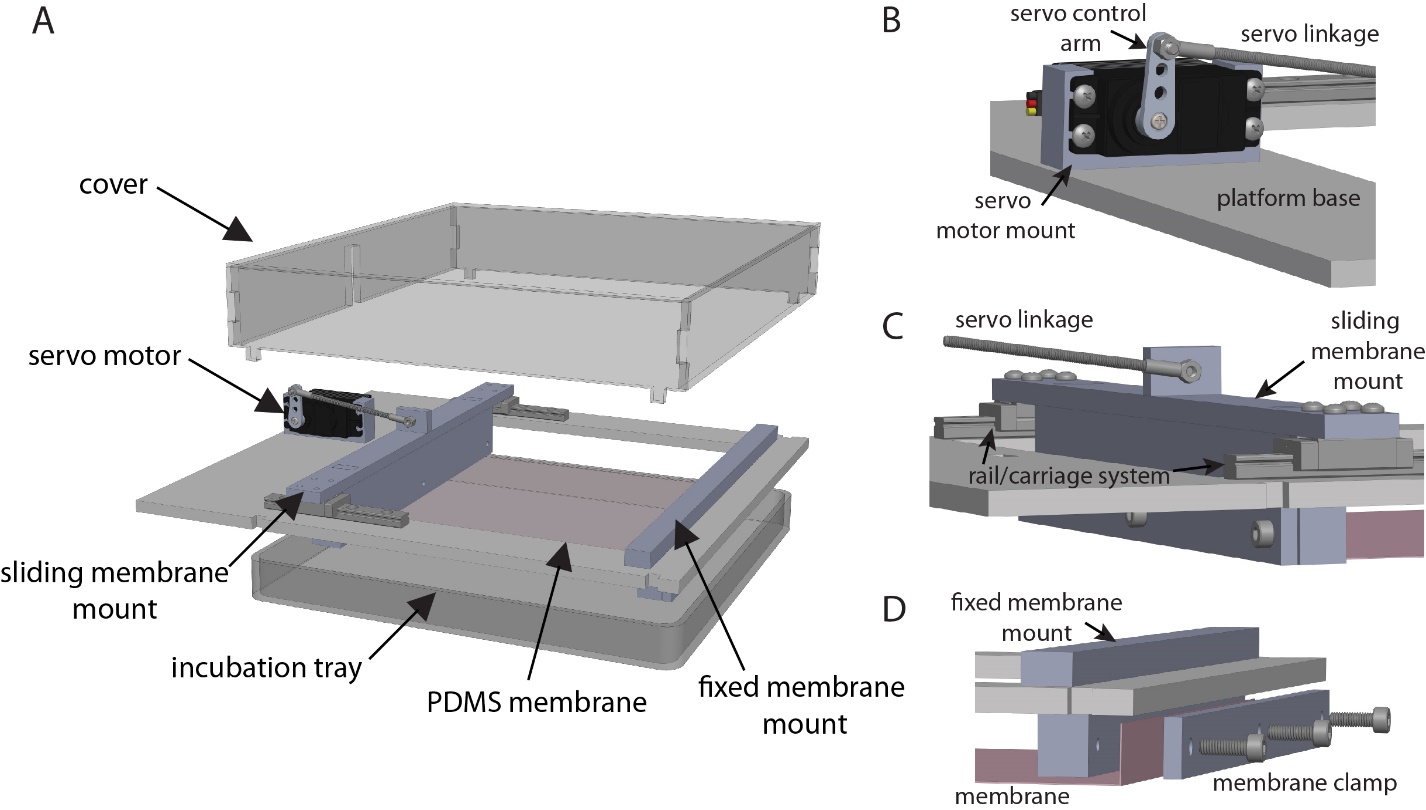
**
